# Supplementary material for: Facile synthesis of a biocompatible silver nanoparticle derived tripeptide supramolecular hydrogel for antibacterial wound dressings
Source: Royal Society of Chemistry journal article supplement (doi:10.1039/c5nj01981h), 2015-12-11
Supplement: c5nj01981h1.pdf [file c5nj01981h1.pdf]

# Supporting Information

## **Facile synthesis of biocompatible silver nanoparticle derived tripeptide supramolecular hydrogel for antibacterial wound dressings**

Turibius Simon, Chung-Shu Wu, Jie-Chuan Liang, Chieh Cheng, and Fu-Hsiang Ko\*

Department of Materials Science and Engineering, National Chiao Tung University,

Hsinchu 300, Taiwan.

\*Corresponding Author: Prof. Fu-Hsiang Ko

Department of Materials Science and Engineering

Institute of Nanotechnology

1001 Ta Hsueh Road, Hsinchu, Taiwan 30050

Tel: 886-35712121 ext 55803, Fax: 886-35724727

E-mail: [fhko@mail.nctu.edu.tw](mailto:fhko@mail.nctu.edu.tw)

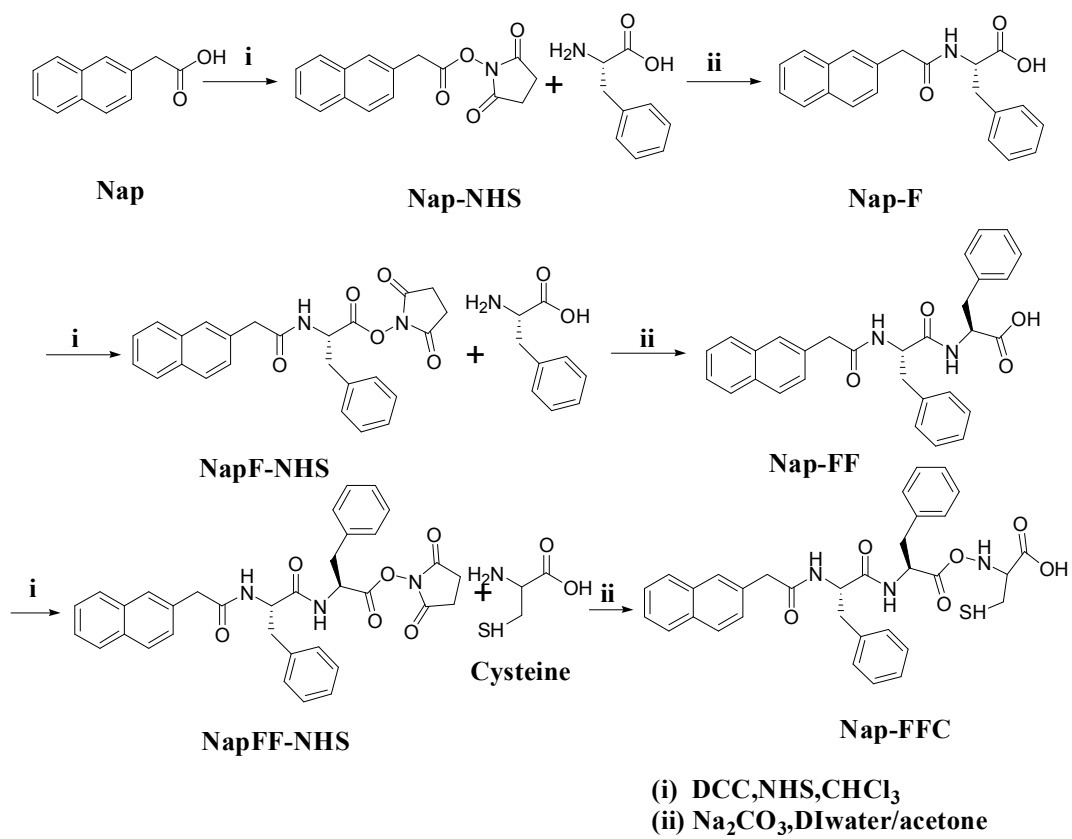

**Fig. S1.** The overall flow chart of Nap-FFC synthesis

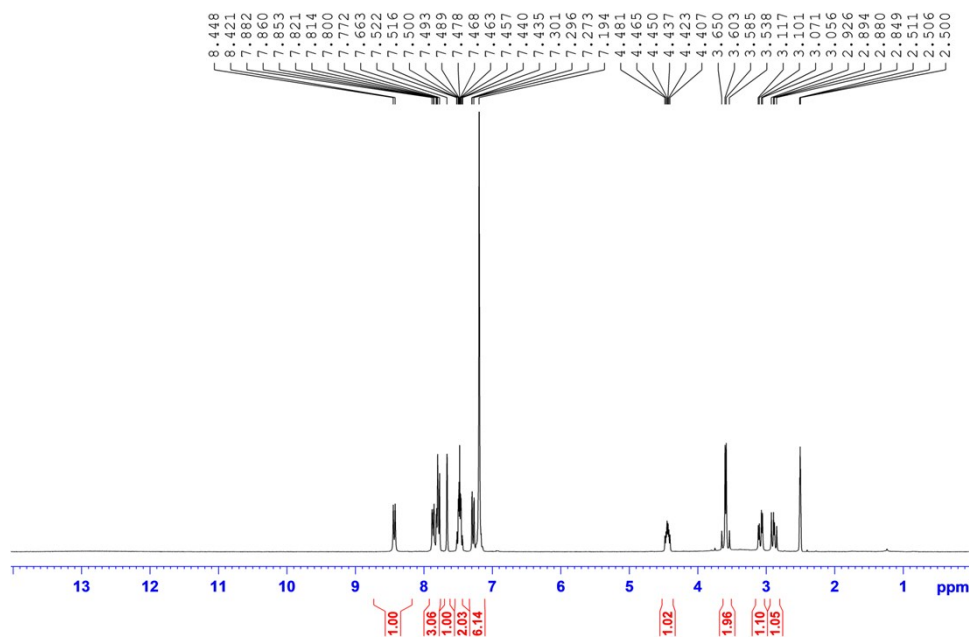

**Fig. S2.** <sup>1</sup>H NMR (300MHz) spectra of Nap-F peptide.

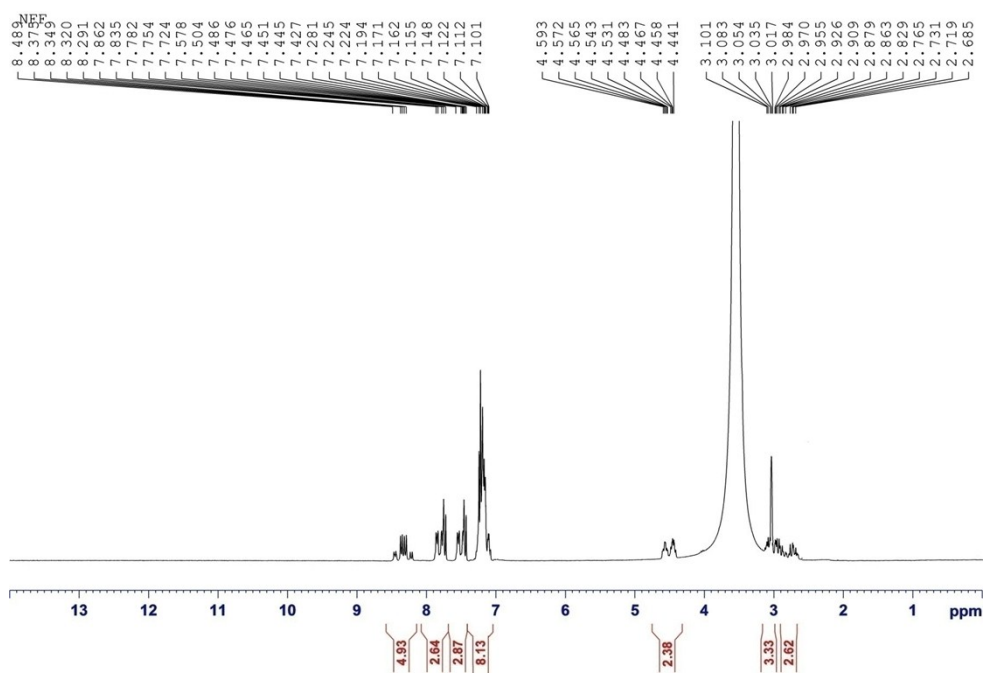

**Fig. S3.**  $^1\text{H}$  NMR (300MHz) spectra of Nap-FF peptide.

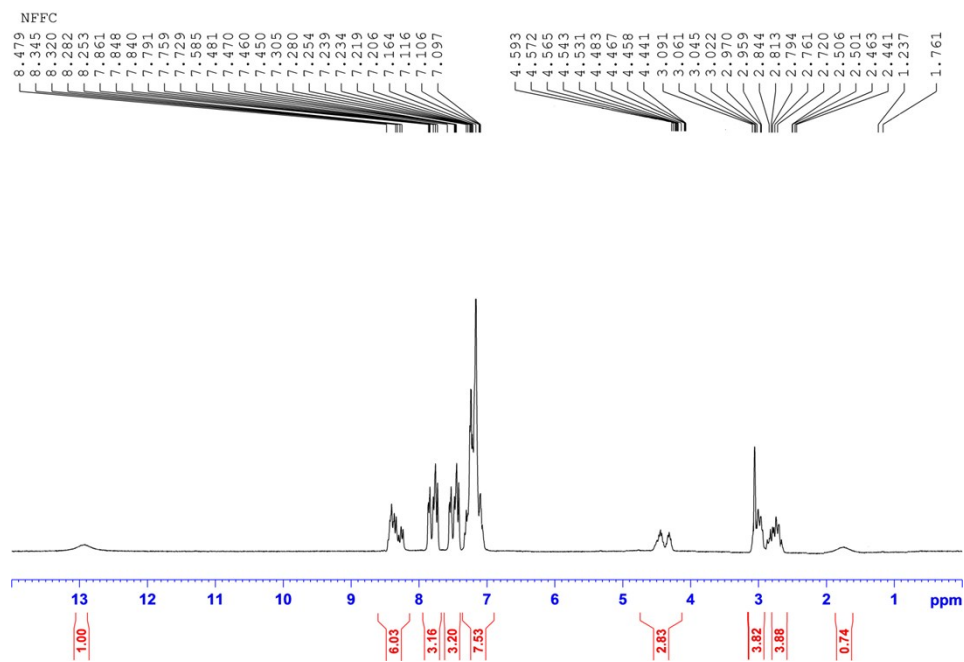

**Fig. S4.**  $^1\text{H}$  NMR (300MHz) spectra of Nap-FFC peptide.

C: 0-1000 H: 0-1000 N: 1-1 O: 3-3  
aa:700

0820\_aa:700\_2 13 (1.327)

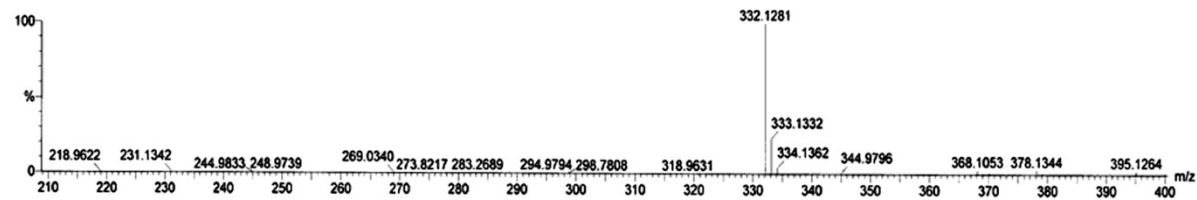

Minimum: -1.5  
Maximum: 5.0 100.0 1000.0

| Mass     | Calc. Mass | mDa  | PPM  | DBE  | i-FIT | i-FIT (Norm) | Formula      |
|----------|------------|------|------|------|-------|--------------|--------------|
| 332.1281 | 332.1287   | -0.6 | -1.8 | 13.5 | 38.5  | 0.0          | C21 H18 N O3 |

**Fig. S5.** High Resolution mass analysis [HRMS] of Nap-F peptide.

C: 0-1000 H: 0-1000 N: 2-2 O: 4-4

aa1-701

KE267

20-Aug-2014  
14:21:34  
2: TOF MS ES-  
4.23e+003

0620\_aa1-701\_2.25 (2.502)

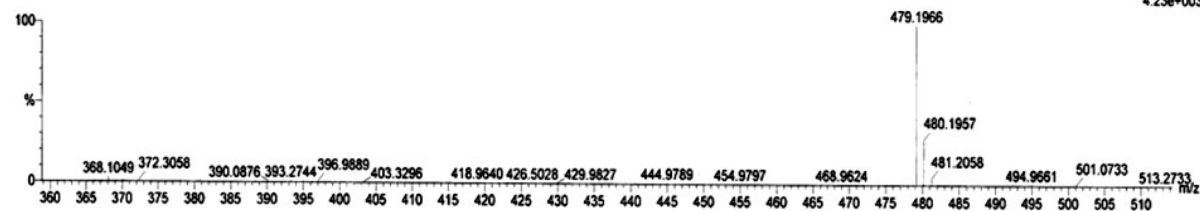

Minimum:

Maximum: 5.0 100.0 -1.5

| Mass | Calc. Mass | mDa | PPM | DBE | i-FIT | i-FIT (Norm) | Formula |
|------|------------|-----|-----|-----|-------|--------------|---------|
|------|------------|-----|-----|-----|-------|--------------|---------|

|          |          |      |      |      |      |     |               |
|----------|----------|------|------|------|------|-----|---------------|
| 479.1966 | 479.1971 | -0.5 | -1.0 | 18.5 | 21.7 | 0.0 | C30 H27 N2 O4 |
|----------|----------|------|------|------|------|-----|---------------|

**Fig. S6.** High Resolution mass analysis [HRMS] of Nap-FF peptide.

C: 0-1000 H: 0-1000 N: 3-3 O: 5-5 S: 1-1  
aa-j-s-1

1120\_aa-j-s-1\_3.11 (0.253) Cm (11-25)

21-Nov  
12:  
1: TOF MS  
1.78e

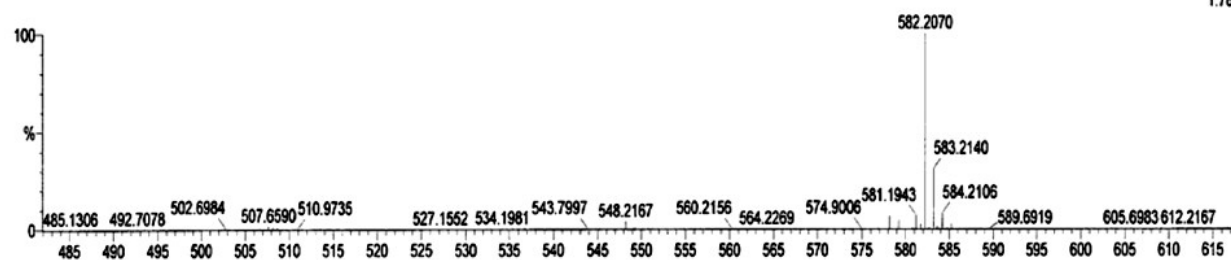

Minimum: -1.5  
Maximum: 5.0 10.0 1000.0

| Mass     | Calc. Mass | mDa | PPM | DBE  | i-FIT | i-FIT (Norm) | Formula         |
|----------|------------|-----|-----|------|-------|--------------|-----------------|
| 582.2070 | 582.2063   | 0.7 | 1.2 | 19.5 | 48.6  | 0.0          | C33 H32 N3 O5 S |

Fig. S7. High Resolution mass analysis [HRMS] of Nap-FFC peptide.



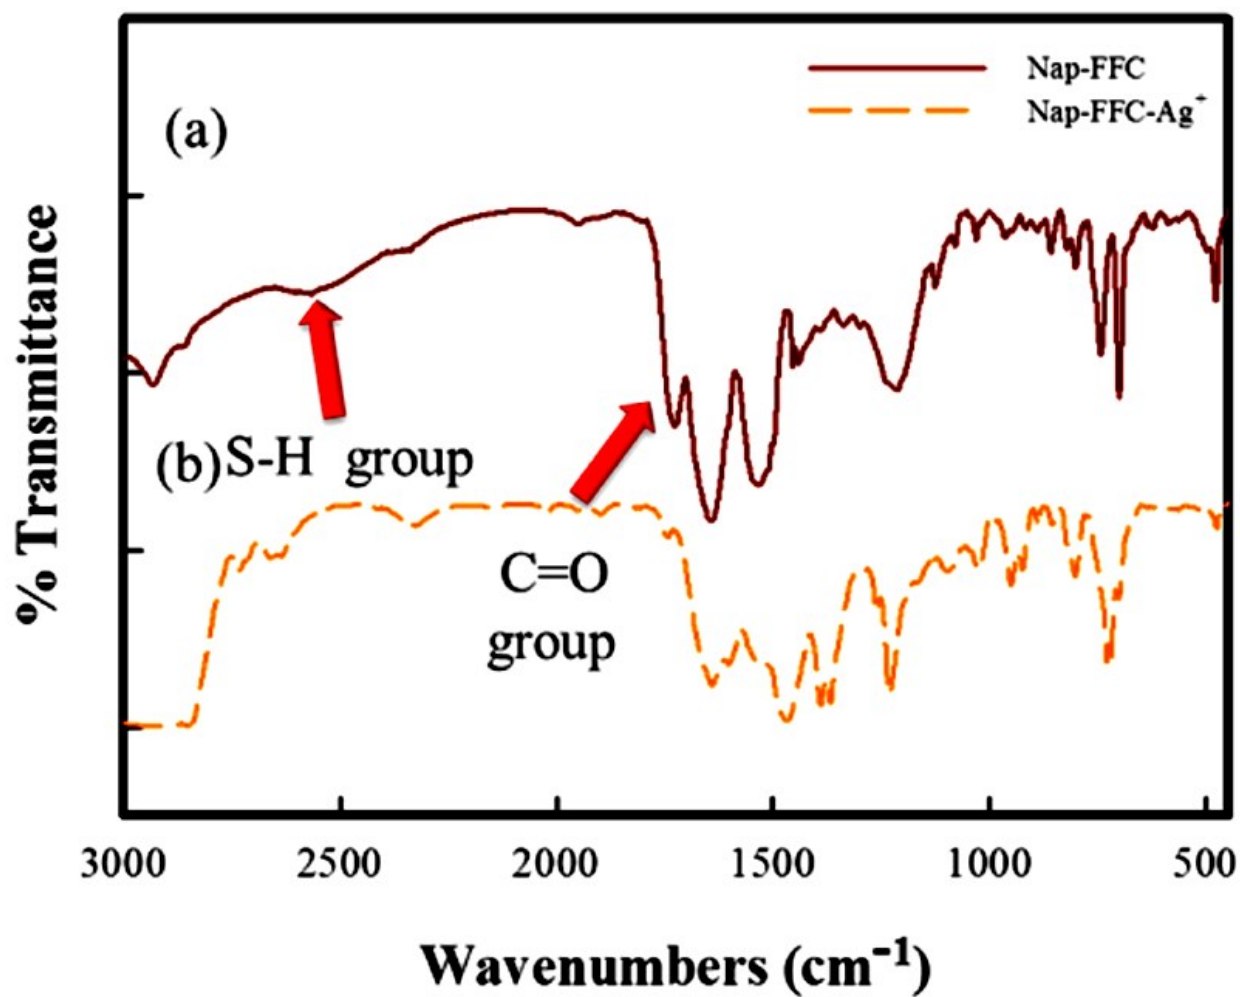

**Fig. S8.** FT-IR spectra of (a) Nap-FFC nanofibers, and (b) Ag<sup>+</sup> ions absorbed on Nap-FFC nanofibers

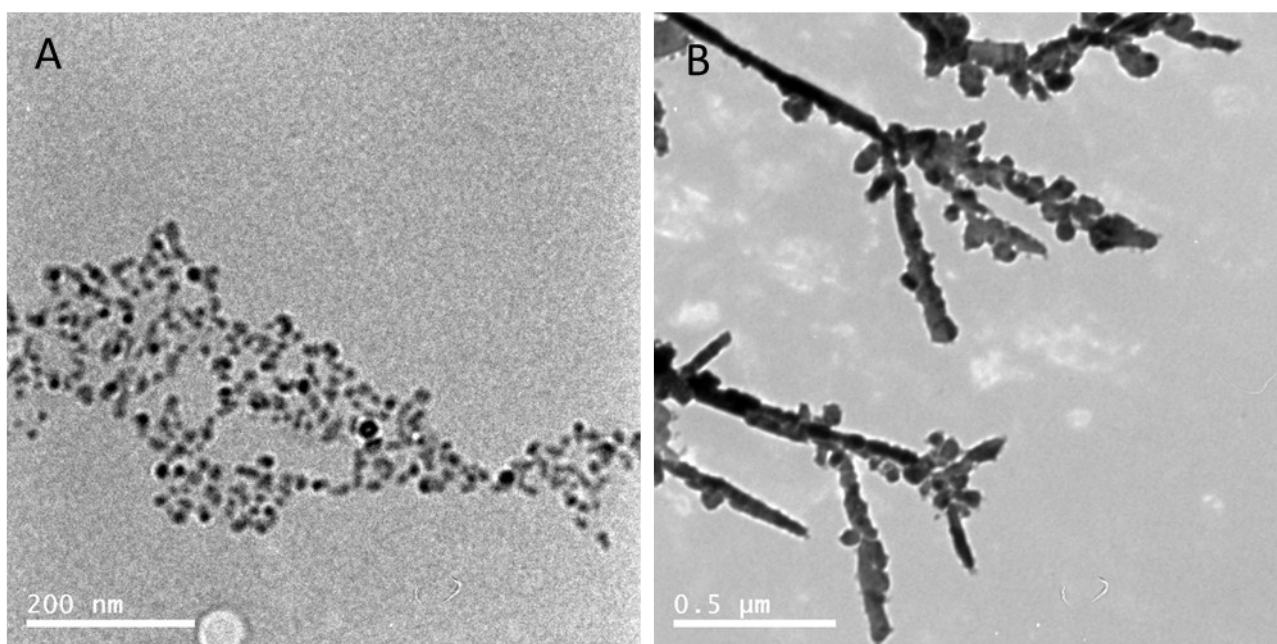

**Fig. S9.** The TEM analysis of (A) AgNPs (B) AgNPs@Nap-FFC nanocomposites.

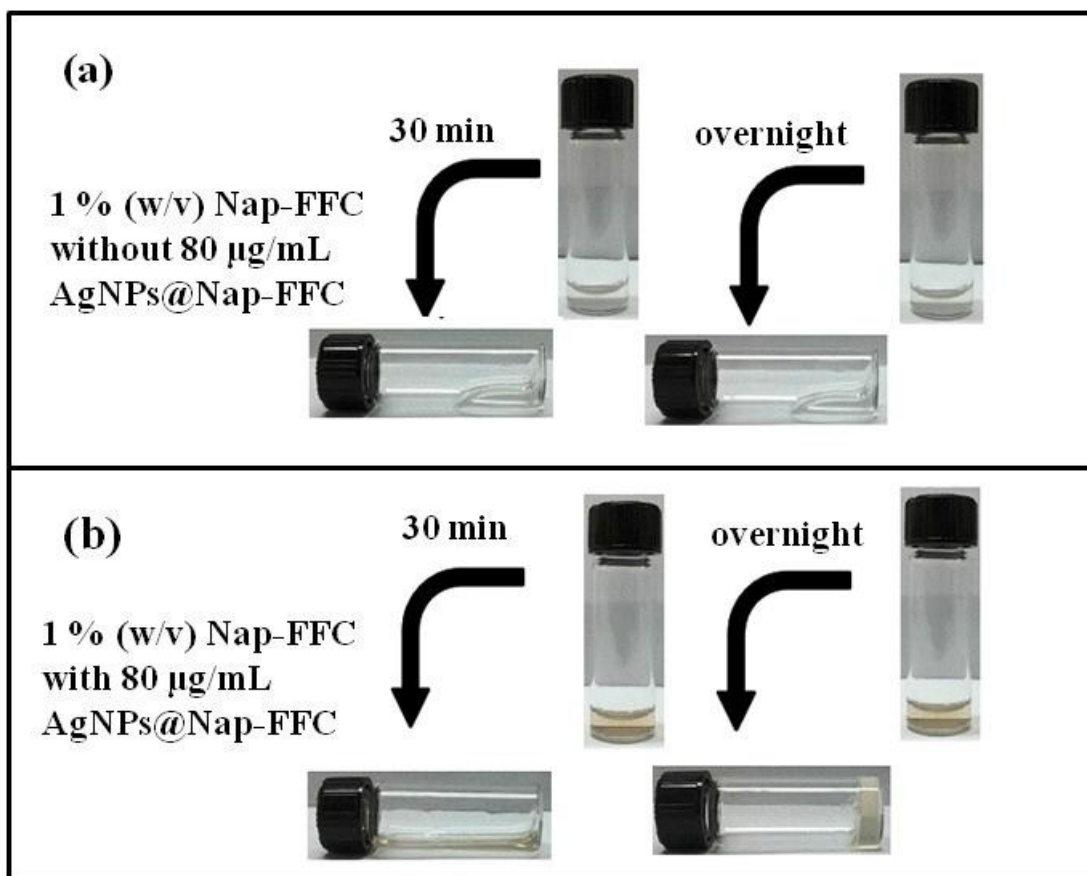

**Fig. S10.** Photograph images (a and b) of 1 % (w/v) Nap-FFC at pH 12 without/with 80  $\mu\text{g/mL}$  AgNPs@Nap-FFC for different times.
